# Supplementary material for: Induction of senescence in primary glioblastoma cells by serum and TGFβ
Source: PubMed Central journal article supplement (PMC5438350; doi:10.1038/s41598-017-02380-1), 2017-05-19

Supplementary Figures for:

*Induction of senescence in primary glioblastoma cells by serum and TGF $\beta$*

Ritesh Kumar, Alexander Gont, Theodore J Perkins, Jennifer E L Hanson and Ian AJ Lorimer

*Supplementary Figure S1.* A. Representative images of  $\gamma$ H2AX immunofluorescence in WI38 cells with and without radiation treatment (as a positive control) and PriGO8A cells with and without serum treatment. Quantitative data are shown in Figure 3A. B. PriGO8A cells were treated with the indicated doses of radiation. Floating and adherent cells were harvested at the indicated time points. Total and live cells counts were determined using a Vi-Cell XR cell counter (Beckman Coulter, Mississauga, ON, Canada).

*Supplementary Figure S2.* EdU incorporation in PriGO9A and PriGO17A cells without and with serum exposure. Data in bar graphs are from five randomly selected fields per condition.

\* indicates  $p < 0.05$  by the Mann-Whitney Rank Sum test.

Figure S1.

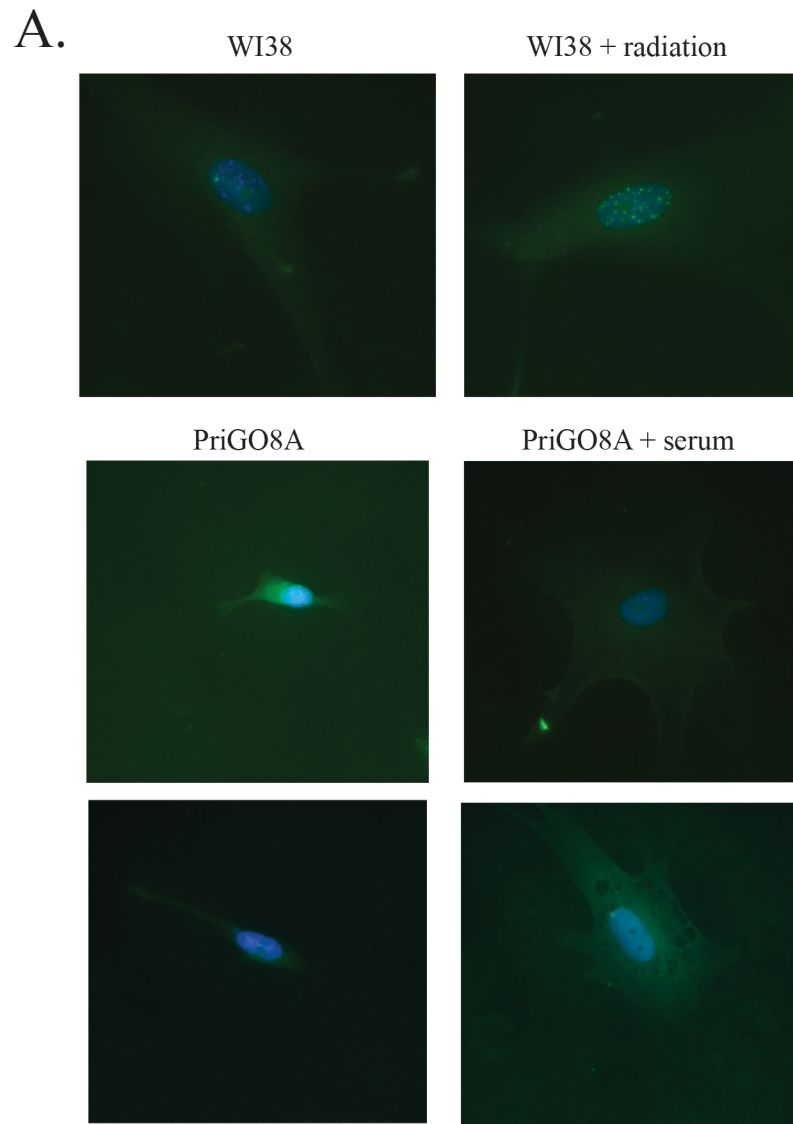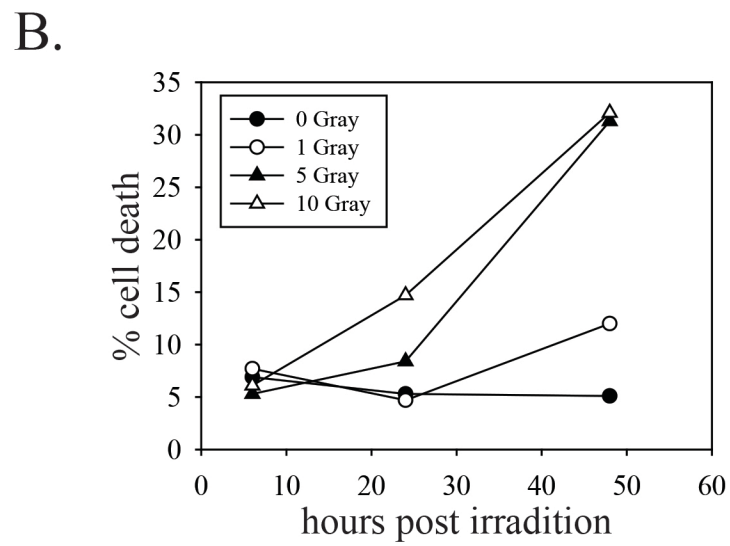

Figure S2.

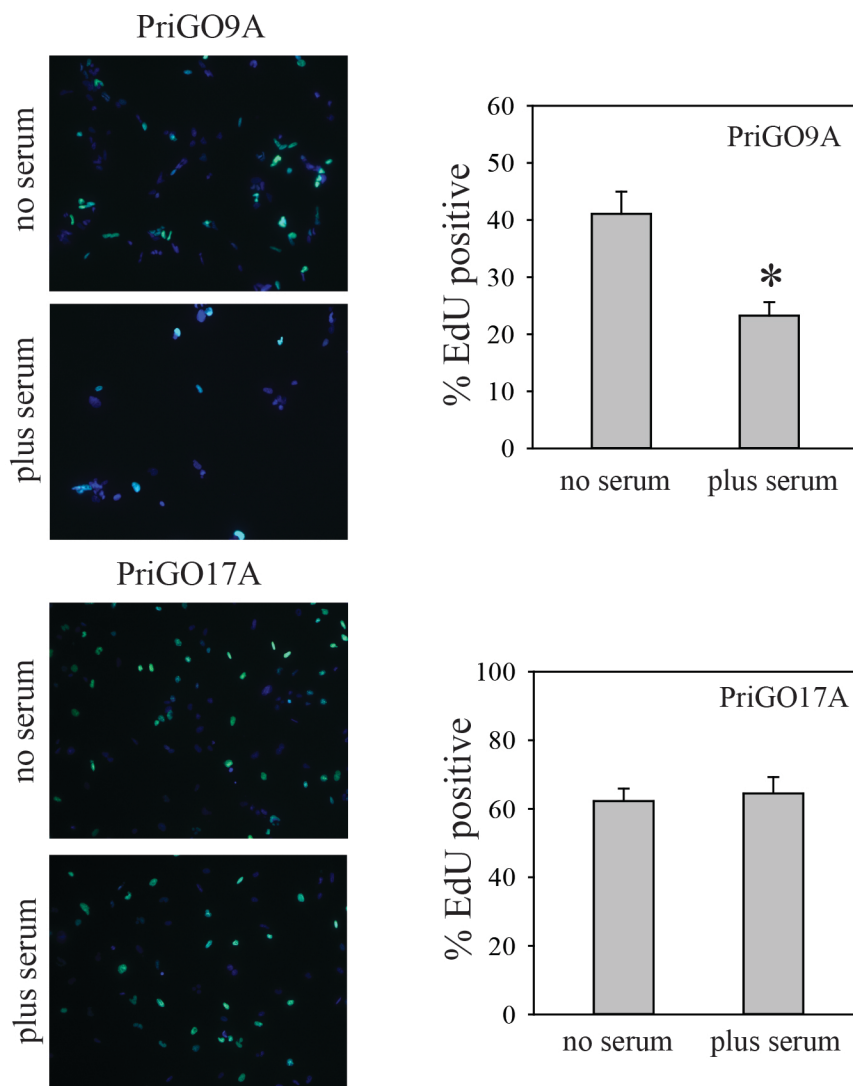

Supplement: 41598_2017_2380_MOESM1_ESM.pdf [file 41598_2017_2380_MOESM1_ESM.pdf]
